# Supplementary material for: Effect of surgical treatment for anorectal melanoma: a propensity score-matched analysis of the Surveillance, Epidemiology, and End Results programme data
Source: HighWire-hosted journal article supplement (doi:10.1136/bmjopen-2021-053339), 2022-04-01
Supplement: bmjopen-2021-053339supp001_data_supplement.pdf [file bmjopen-2021-053339supp001_data_supplement.pdf]

**Supplementary Table 1 The AM code of LEE and MEE in Rectal and Anal**

|        | LS                                                  | ES                                                  |
|--------|-----------------------------------------------------|-----------------------------------------------------|
| Rectal | RX Summ Surg Prim Site (1998+) codes of 10 to 28    | Summ–Surg Prim Site (1998+) codes of 30 to 70       |
|        | Site specific surgery (1983–1997) codes of 10 to 20 | Site specific surgery (1983–1997) codes of 30 to 60 |
| Anal   | Summ–Surg Prim Site codes of 10 to 27               | Summ–Surg Prim Site codes of 60 to 63               |
|        | Site specific surgery codes of 10 to 40             | Site specific surgery codes: 40 and 50              |
